# Supplementary material
Source: publisher figshare collection journal article supplement (https://rs.figshare.com/ndownloader/files/21377787)
Supplement: Supplementary file 1 [file 21377787]

**Supplemental material for “Prehistoric baseline reveals substantial decline of oyster reef condition in a Gulf of Mexico conservation priority area”**

Stephen G. Hesterberg[[1]](#footnote-1), Gregory S. Herbert2, Thomas J. Pluckhahn3, Ryan M. Harke3, Nasser M. Al-Qattan2, C. Trevor Duke3,4, Evan W. Moore2,5, Megan E. Smith2,5, Alexander C. Delgado3, Christina P. Sampson6

1Department of Integrative Biology, University of South Florida, 4202 East Fowler Ave, SCA 110, Tampa, FL, 33620

2School of Geosciences, University of South Florida, 4202 East Fowler Ave, NES 107, Tampa, FL, 33620

3Department of Anthropology, University of South Florida, 4202 East Fowler Ave, SOC 107, Tampa, FL, 33620

4Department of Anthropology, University of Florida, PO Box 117305, Gainesville, FL, 32611

5Department of Marine Geosciences, University of Miami Rosenstiel School of Marine and Atmospheric Science, 4600 Rickenbacker Causeway Miami, FL, 33149

6The Department of Anthropology, University of Michigan, 101 West Hall, 1085 S. University Ave, Ann Arbor, MI, 48109

**Appendix S1**

*Description of study sites*

The Big Bend region stretches from Apalachee Bay to Anclote Key (figure S1) and is characterized by a low-wave-energy environment with siliciclastic sediments overtopping shallow, sometimes exposed, limestone bedrock [1]. Tidally dominated rivers interrupt the irregular marsh coastline and discharge freshwater to form low-salinity embayments active with intertidal reef formation [1]. Some of the larger oyster reefs within the Big Bend are estimated to be 2,800-4,000 years old [2,3], and numerous prehistoric shell features are scattered along the coastline [2,4] suggesting high oyster productivity in this region for millennia.

The two well-studied archaeological sites used in this study (Crystal River and Roberts Island) were occupied sequentially by indigenous peoples from approximately AD 50-1050 (figure S1) [5]. The Crystal River site extends 10 ha and consists of an extensive, comma-shaped midden and at least five mounds of shell and earth, one more than 8 m high [6]. The nearby Roberts Island site, the largest of several related sites that comprise a complex of the same name [7], includes a broad shell midden totaling around 8 ha (15-20 ac), as well as one 4 m tall mound of shell [5]. Bayesian modeling of radiocarbon dates (*n* = 50) suggests that settlement of the Crystal River site began between cal A.D. 65-224 (95% probability) and increased in size and permanence until around cal A.D. 435-544 (95% probability), after which people began moving to Roberts Island [5]. The latter site reached its maximum extent sometime after cal A.D. 722-881 (95% probability). Crystal River and Roberts Island fell into disuse at the conclusion of the final phase of occupation between cal A.D. 890 and 1068 (95% probability).

**
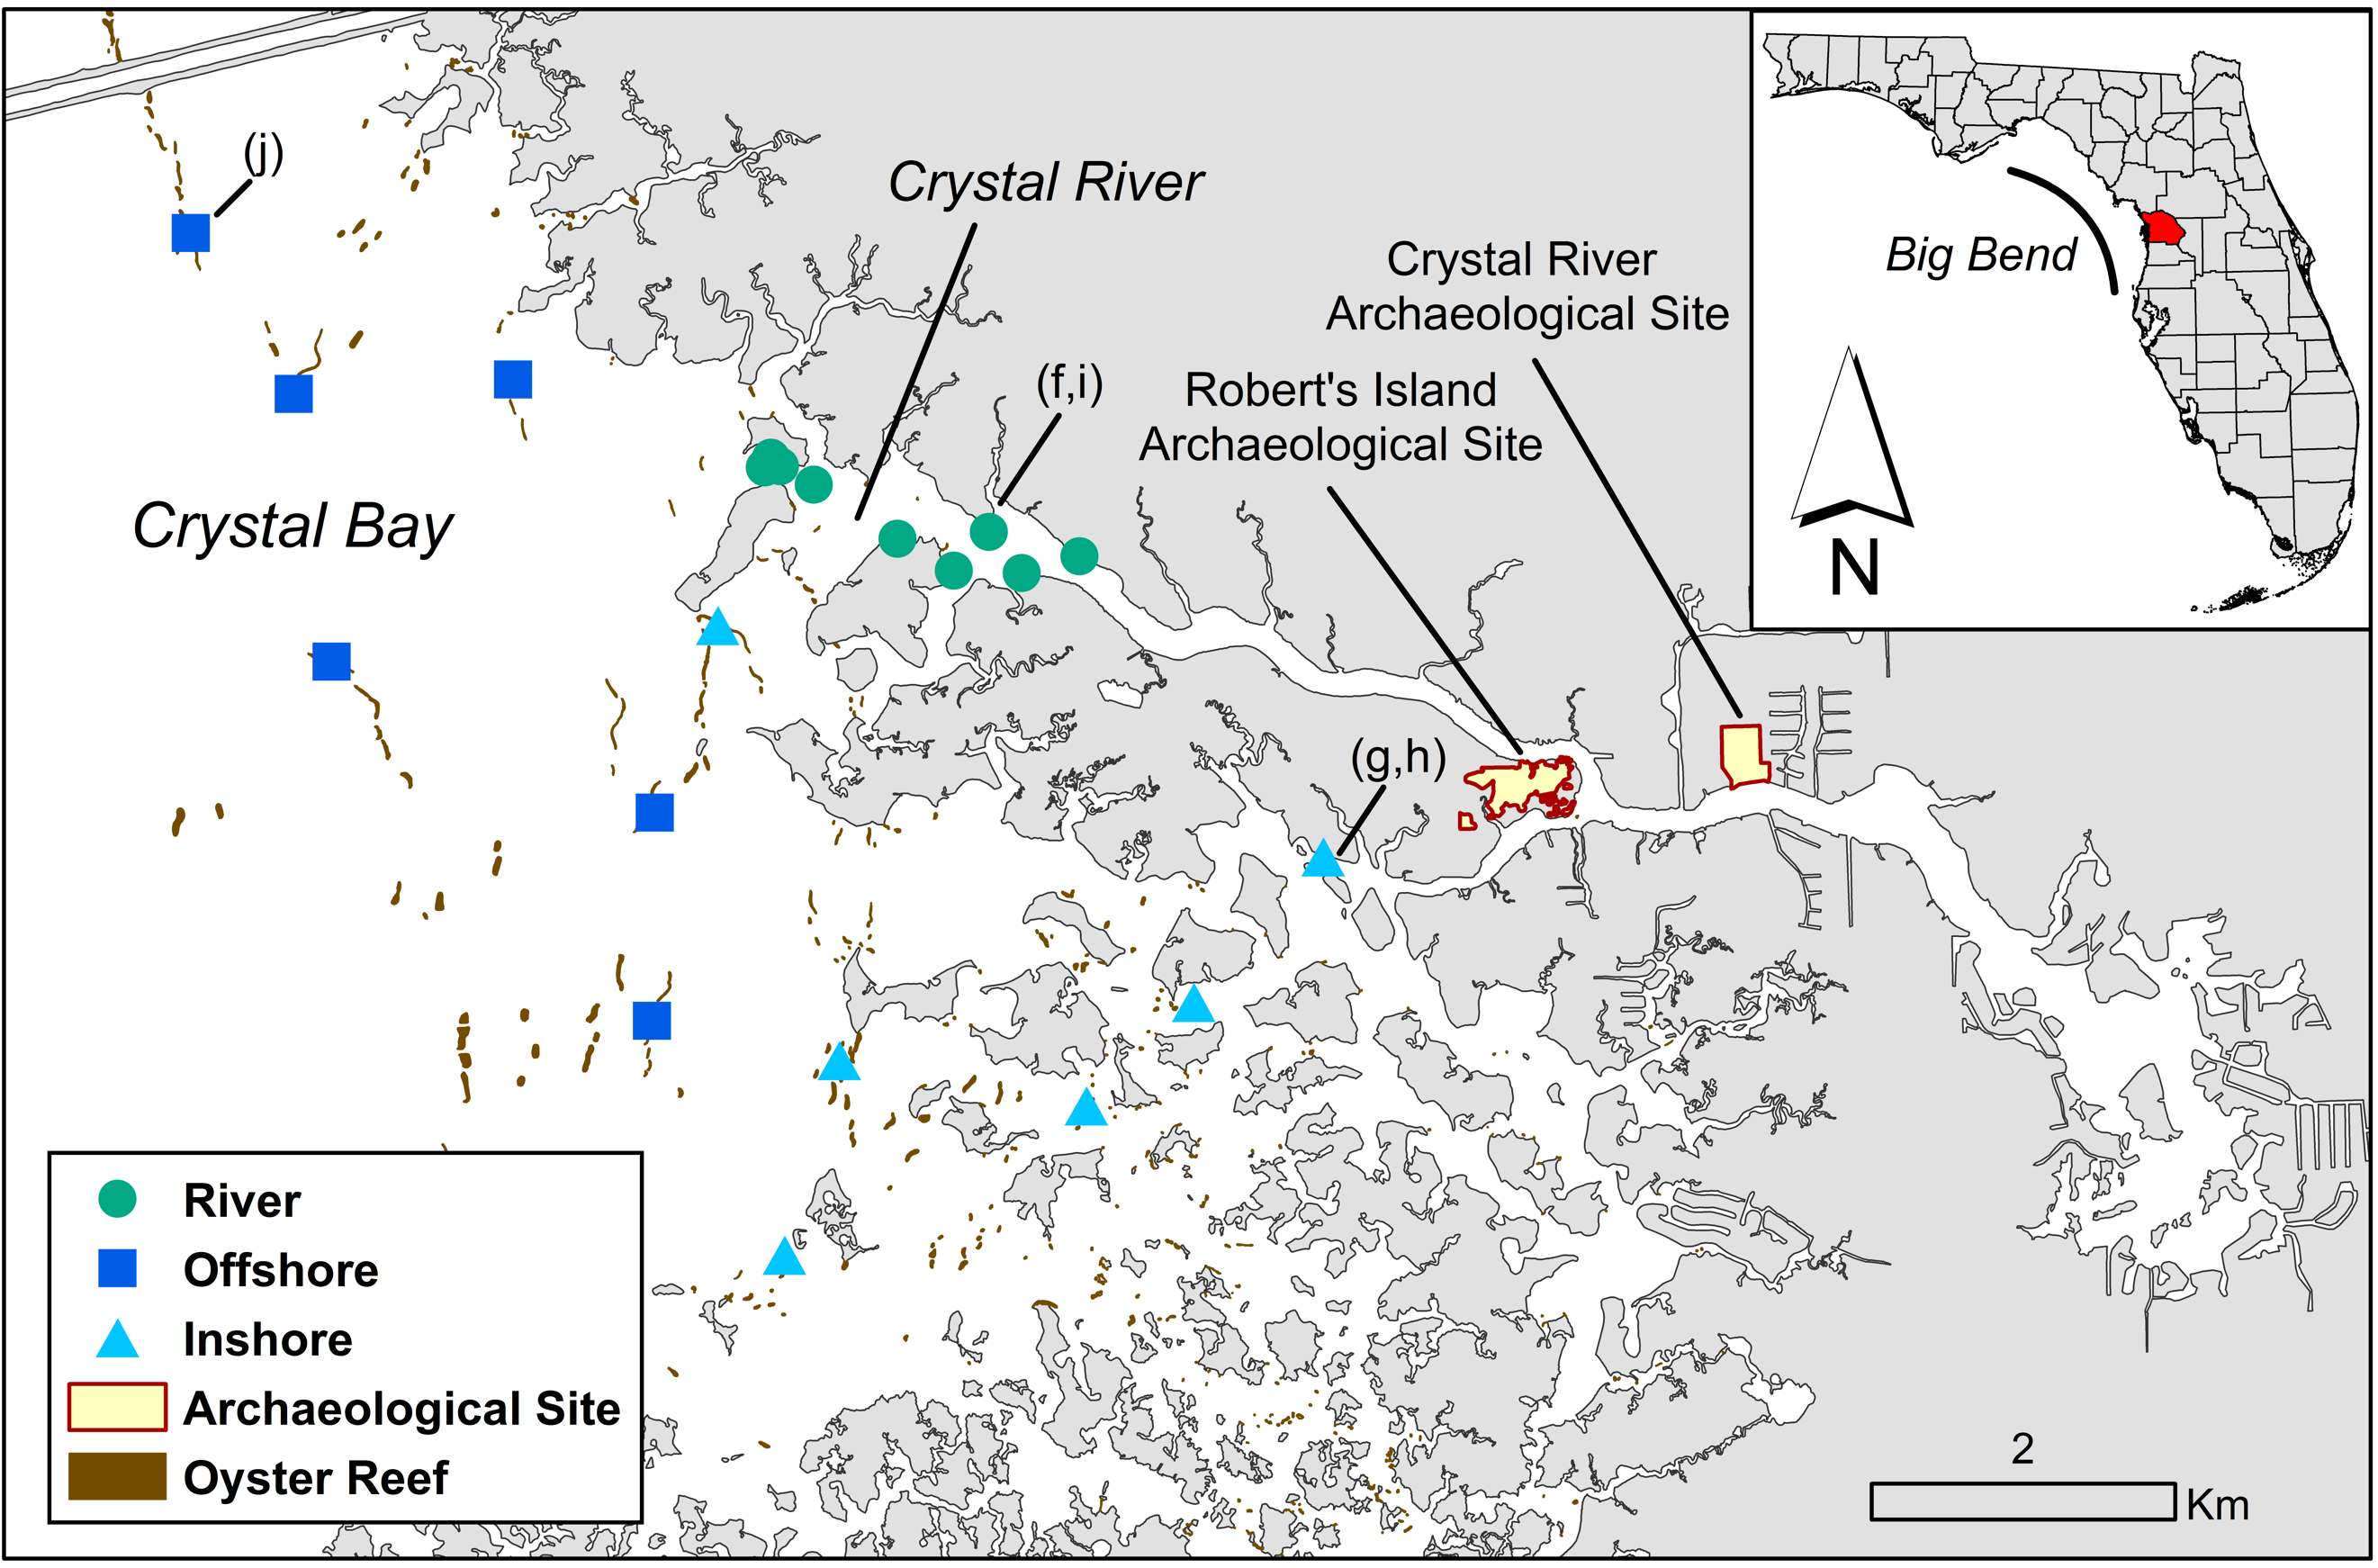
**

**Figure S1**. Map showing the location of modern oyster sampling sites (River, Inshore, and Offshore) relative to archaeological sites (Crystal River and Roberts Island) near Crystal River, Florida. Modern oysters were sampled along the salinity gradient from river to offshore areas, encompassing the current oyster habitat available within the estuary. Prehistoric shells were obtained from excavations of middens and mounds at both the Crystal River and Robert’s Island archaeological sites. Insets show location of study area (Citrus county) within the Big Bend region of Florida (top right). The locations of individual modern shells (f-j) used in stable isotope analysis (see figure S3) are also identified at river, inshore, and offshore sites.

**Appendix S2**

**
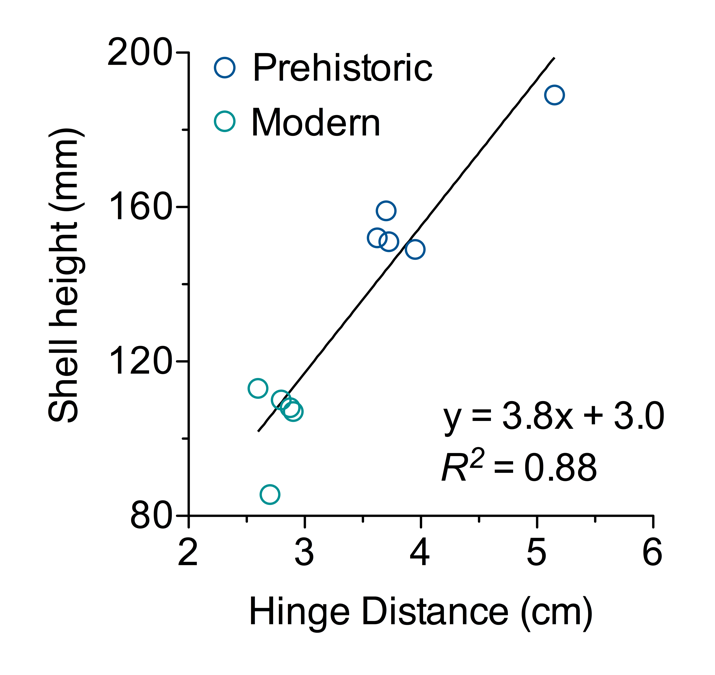
**

**Figure S2**.Relationship between hinge distance and shell height for the large prehistoric and modern Crystal River shells used in stable isotopic analyses (*n* = 5). See Appendix S3 for the complete set of oxygen isotope profiles from all replicate shells.

**Appendix S3**

**
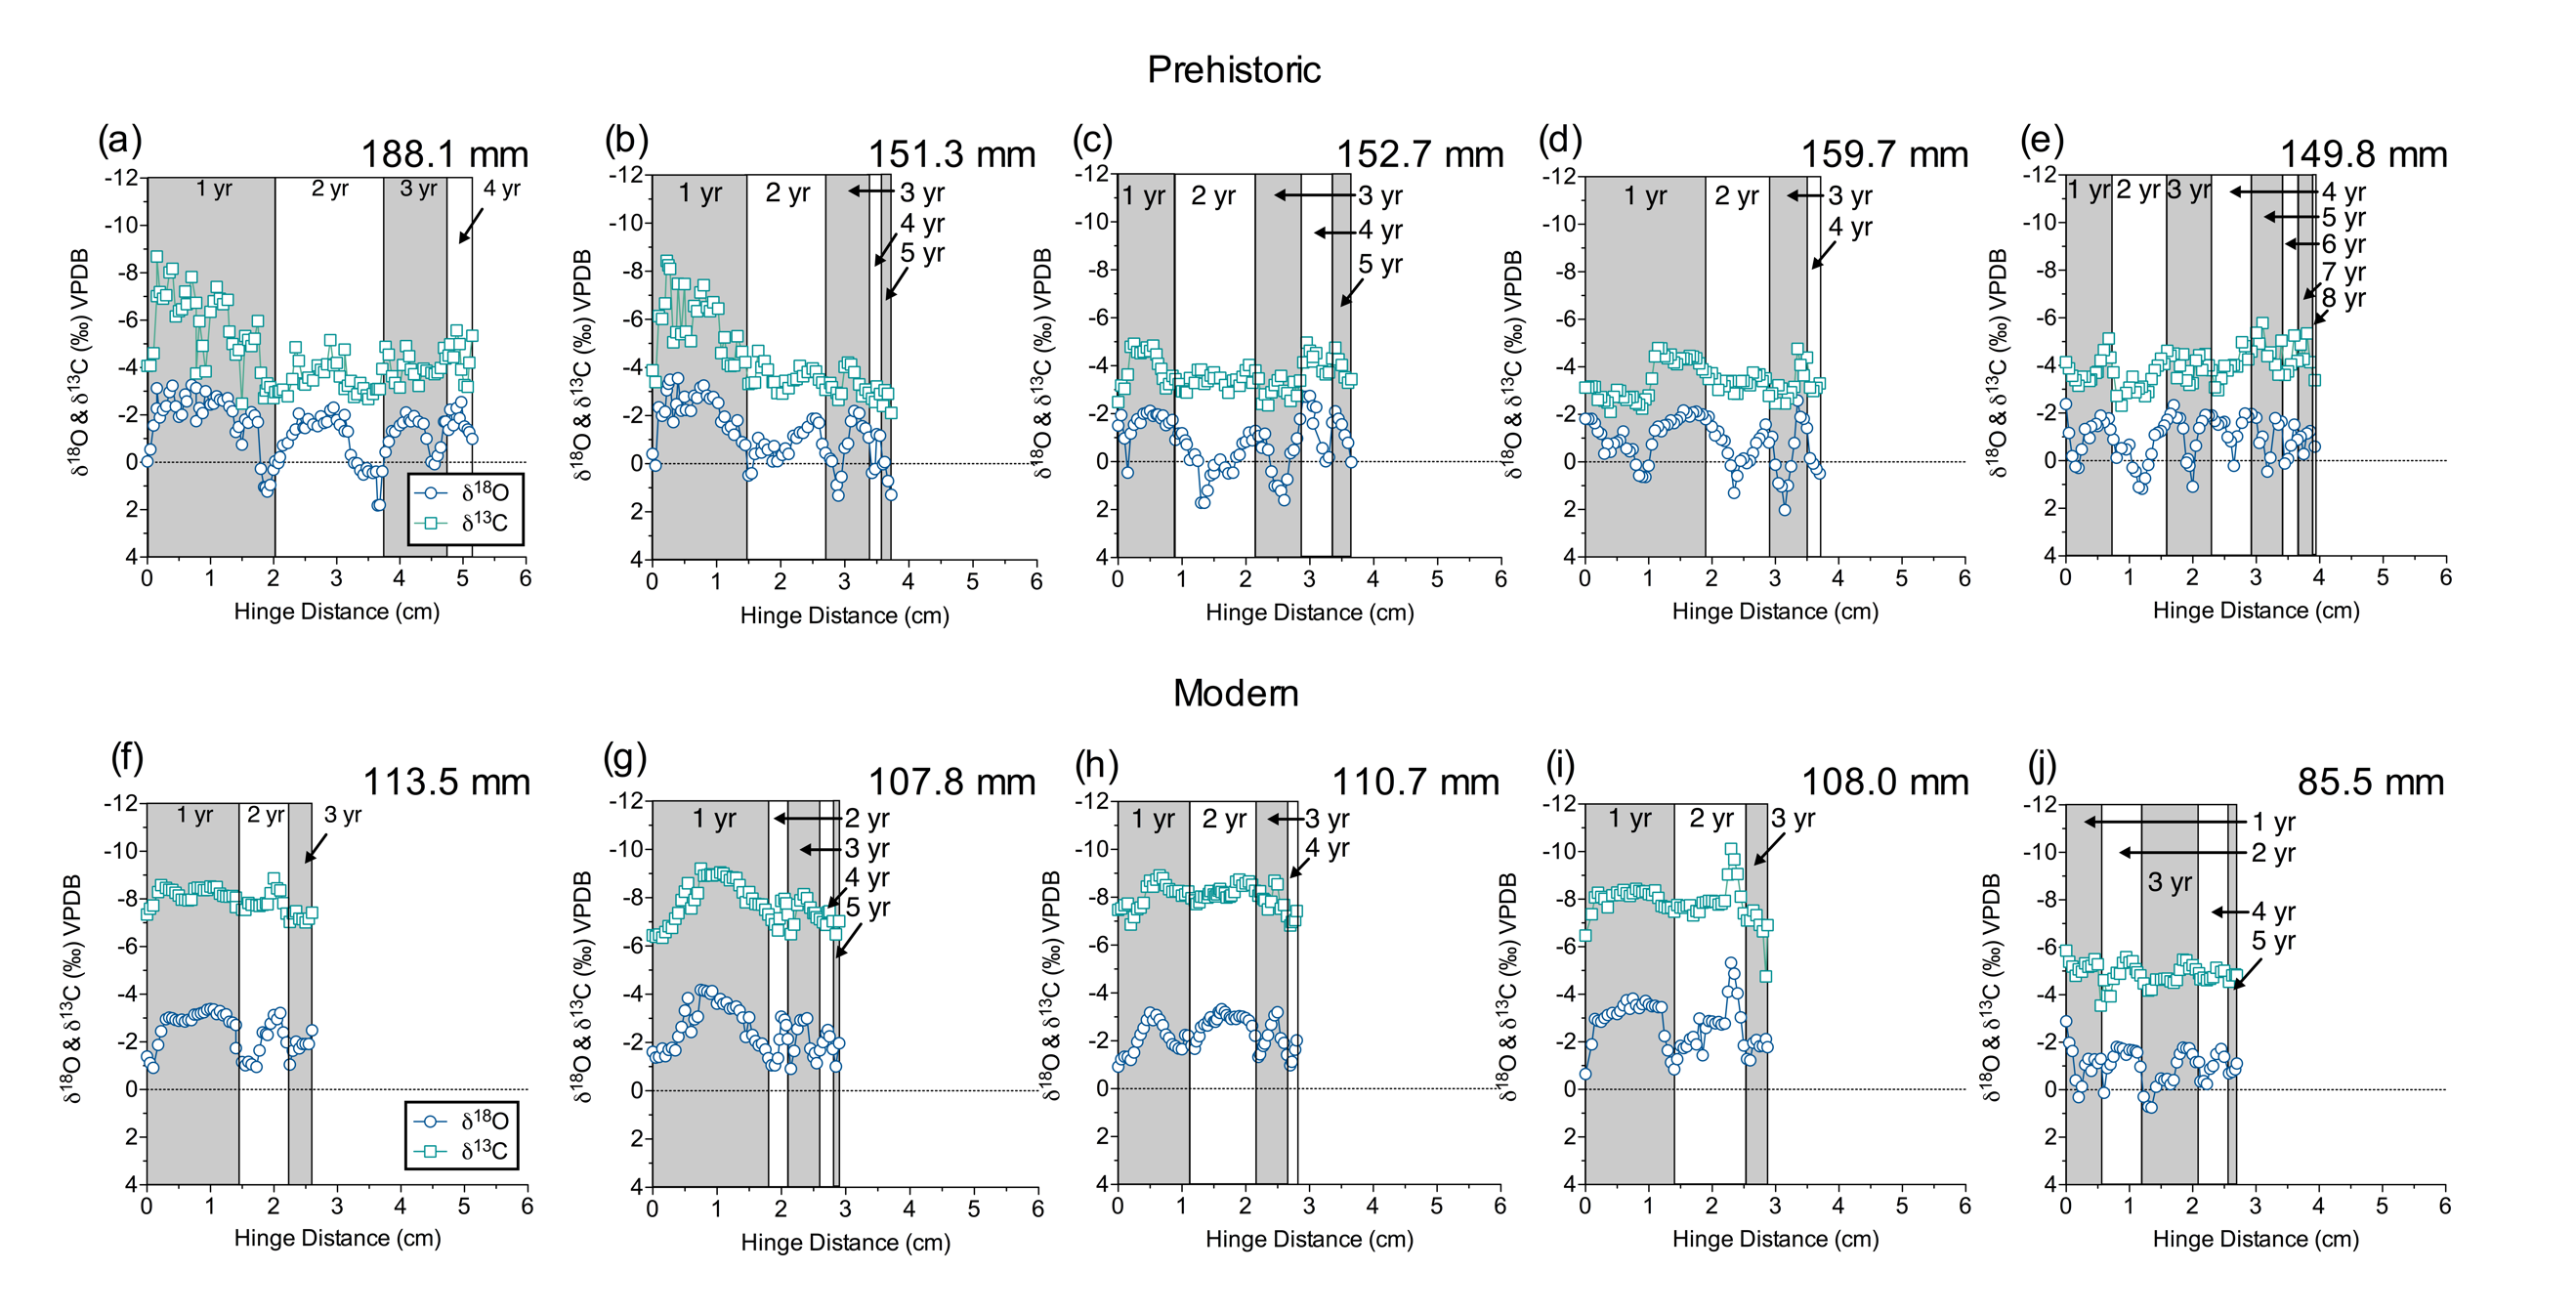
**

**Figure** **S3**. Oxygen (δ18O) and carbon (δ13C) stable isotope signatures from a subsample of large (a-e) prehistoric and (f-j) modern Crystal River shells (*n* = 5). Shell height (mm) is listed for each individual in the upper right. Dotted line on each graph represents zero. Alternating grey and white shading represents annual growth for each individual reconstructed from seasonal fluctuations in oxygen isotope profiles. Midden shells were obtained from Crystal River (a-c) and Robert’s Island archaeological sites (d & e). Modern shells were obtained from river (f & i), inshore (g & h) and offshore sites (j). See figure S1 for the sampling location of each modern oyster used in isotope analysis.

**Appendix S4**

*Relationship between δ­­18O signatures and oyster hinge morphology*

Several studies have assessed whether there are morphological features of *Crassostrea virginica* shells in the mid-Atlantic United States that can be used to infer their lifespan by investigating their oxygen isotope ratios. Kirby *et al*. [8] documented a correlation between undulations (i.e., convex tops) on the hinge surface of Pleistocene-aged *C. virginica* shells from Virginia and relatively higher δ­­18O ratios, and so were interpreted to form in colder months. However, they also documented a weaker relationship in modern *C. virginica* shellsfrom Louisiana. Andrus & Crowe [9] reported that dark-colored bands of *C. virginica* shells from Georgia form during the colder months of the year as they tend to have relatively high δ­­18O values compared to light-colored bands. Zimmt *et al*. [10] reached a similar conclusion based on a higher resolution sampling strategy (i.e., multiple samples per growth band) of modern and Pleistocene-aged *C. virginica* shells from Delaware and Virginia and further categorized bands into seasonally-accreted major bands, non-seasonal early bands, and non-seasonal disturbance bands. However, Surge *et al*. [11] did not find any significant differences between δ­­18O values of dark and light bands of modern *C. virginica* shells from Florida.

In our case, we did not identify any notable differences between δ­­18O values of dark and light bands nor recognize major growth bands. Furthermore, similar to both Surge *et al*. [11] and Zimmt *et al*. [10], we did not identify major undulations (i.e., concave bottoms and convex tops) on the surface of our samples that can be traced to a pattern of δ­­18O maxima or minima. Differences in the findings of the previous studies, including ours, could be due to differences in latitudes and seasonal variability in water temperature at the sampling localities as well as the complex morphology of early growth, which can make it harder to distinguish between different bands [10]. Furthermore, differences in the life span of analyzed oysters and the sampling resolution were also shown to affect how the relationship between δ­­18O values and growth bands are interpreted [10].

**Appendix S5**

**
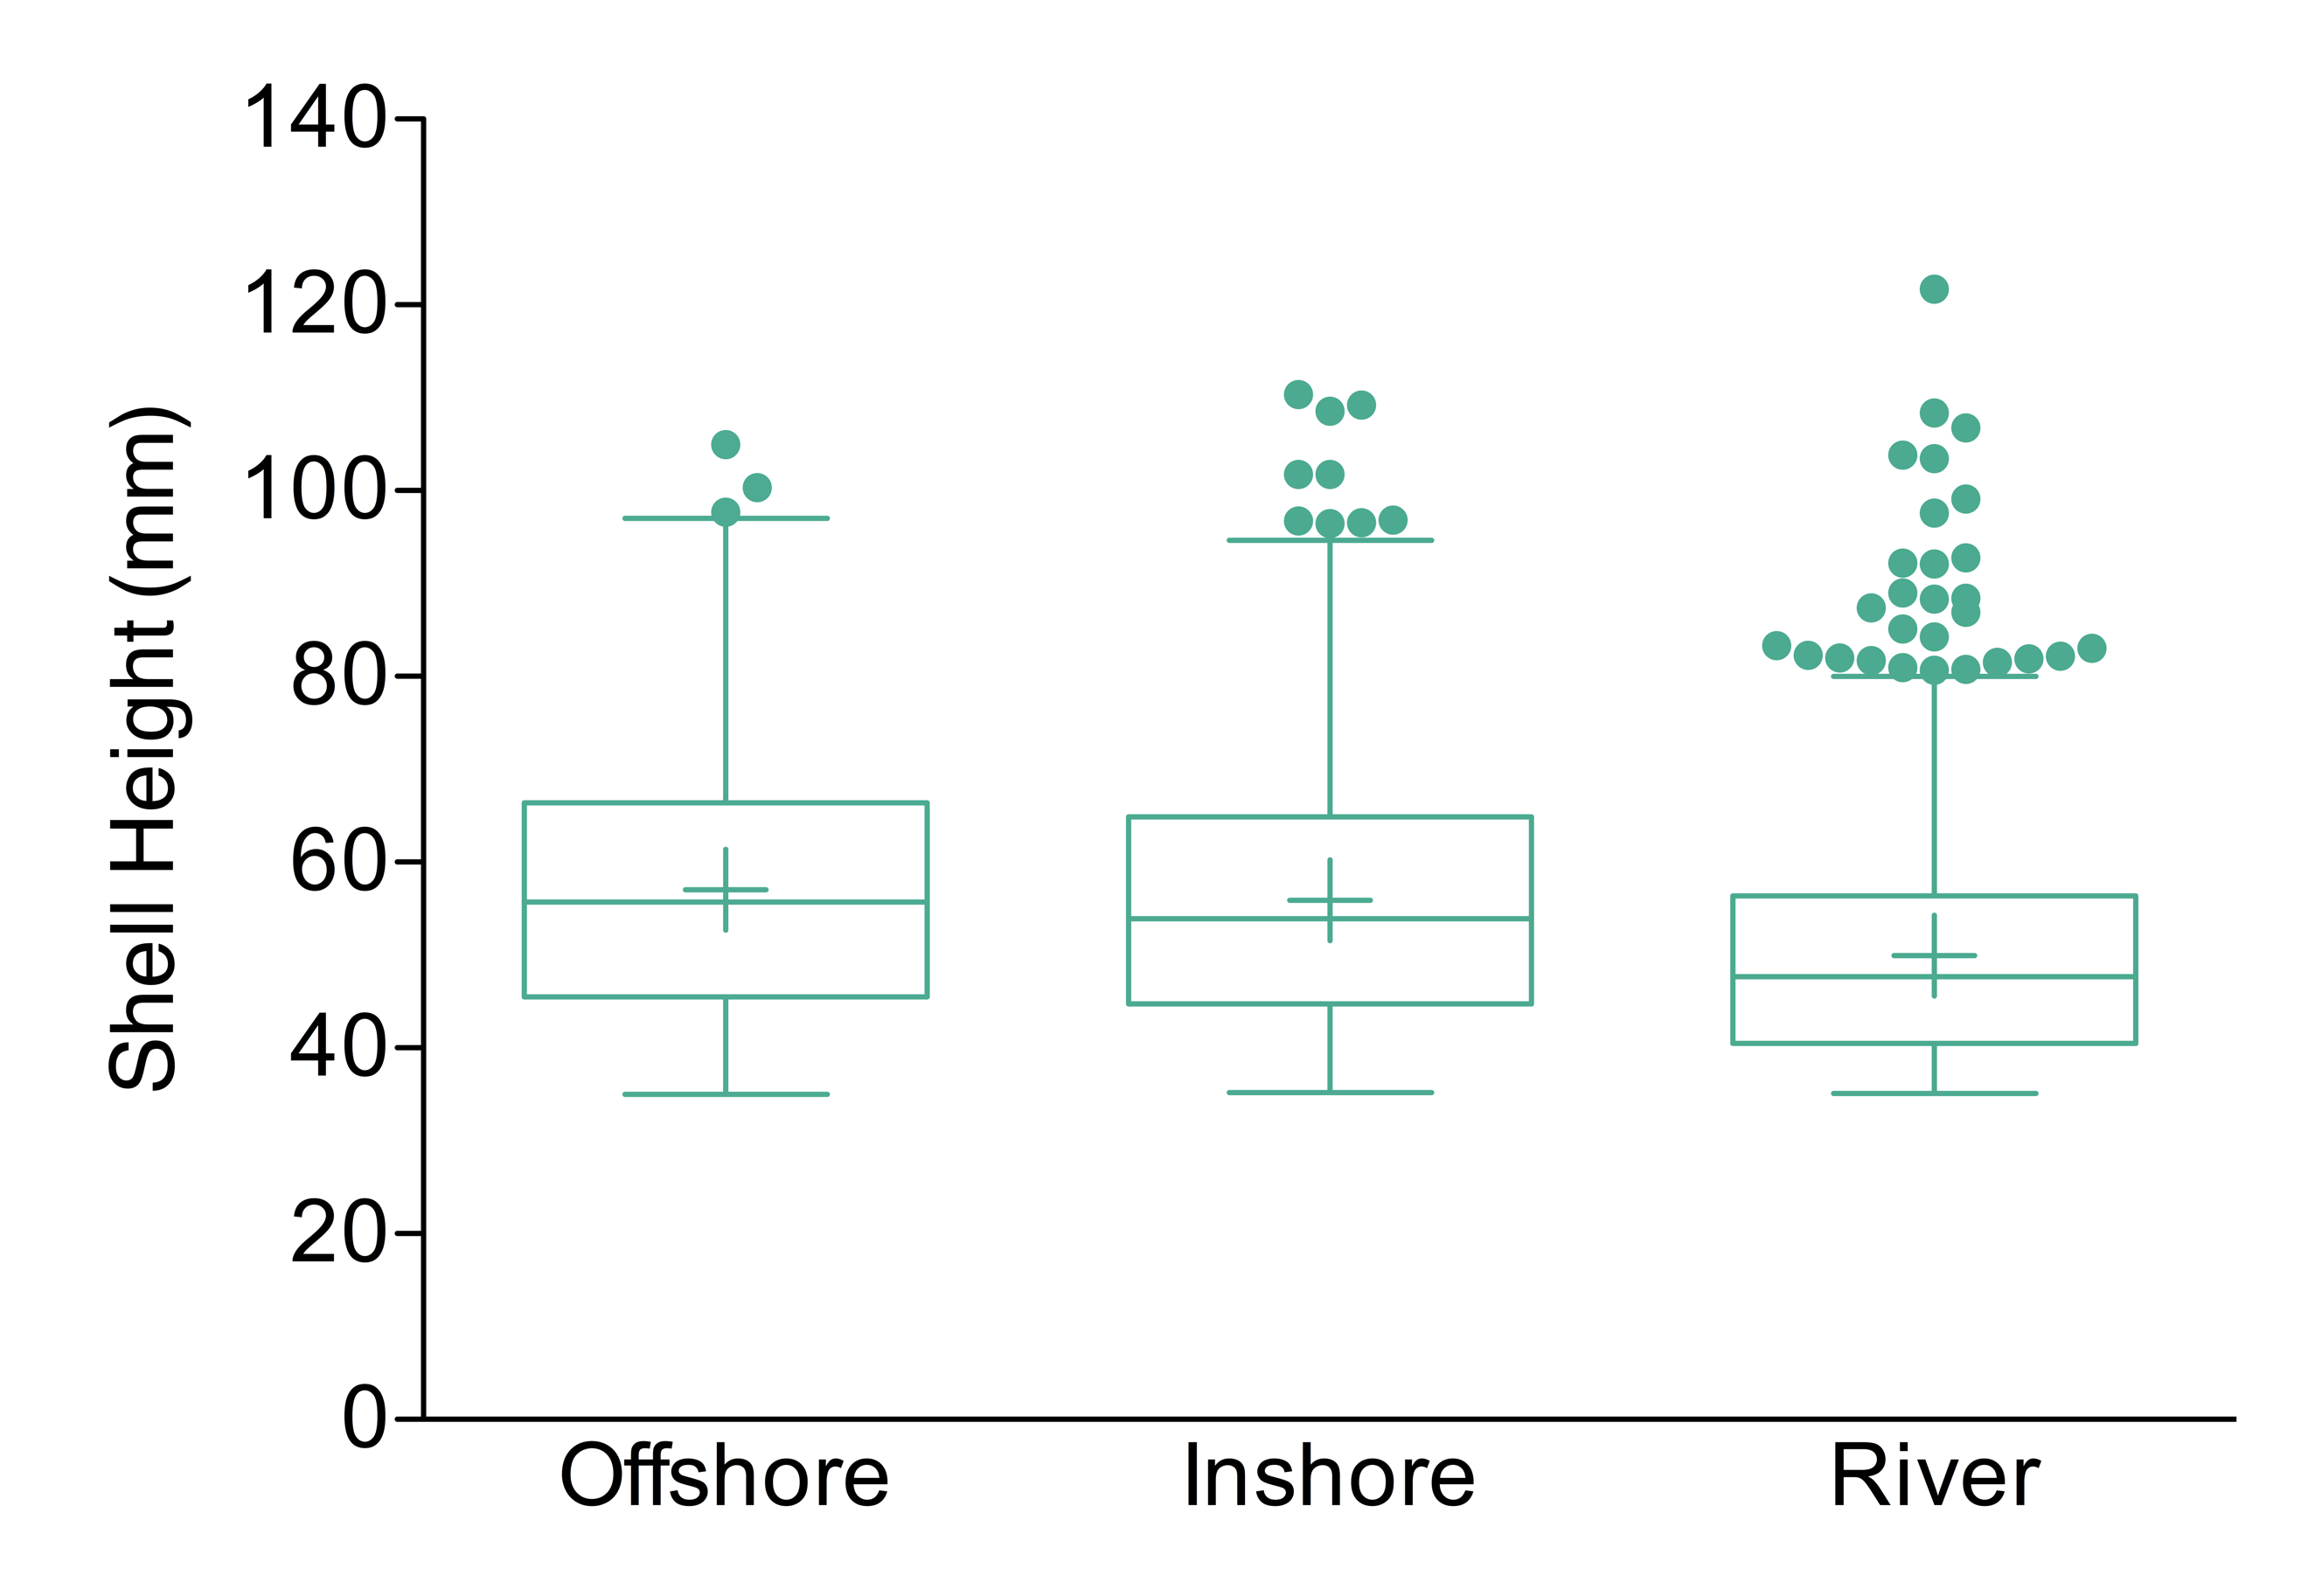
**

**Figure S5**. Box and whisker plots of modern oyster shell height measurements from the Crystal River, Florida estuary. Live oysters were sampled from nine reefs within the river (*n* = 1772), six inshore (*n* = 1419), and six offshore (*n* = 1019), spanning the range of available growing conditions (see Appendix S1). Box and whisker plots show the median (central line), mean (cross), first and third quartiles (box), as well as 1.5× the interquartile range (whiskers). Circles are measurements within 3× the interquartile range of the median.

**Supplemental References**

1. Hine AC, Belknap DF, Hutton JG, Osking EB, Evans MW. 1988. Recent geological history and modern sedimentary processes along an incipient, low-energy, epicontinental-sea coastline: Northwest Florida. *J. Sediment Petrol.* **58**,5670-576. (doi:10.1306/212F8DF5-2B24-11D7-8648000102C1865D)
2. Grinnell RS. 1971. Structure and development of oyster reefs on the Suwannee River delta, Florida. PhD. SUNY, Binghamton, NY, USA.
3. Wright EE, Hine AC, Goodbred SL, Locker SD. 2005. The effect of sea-level and climate change on the development of a mixed siliciclastic-carbonate, deltaic coastline: Suwannee River, Florida, U.S.A. *J. Sediment. Res.* **75**,621-635. (doi:10.2110/jsr.2005.051)
4. Dean J, Ellis GD, Martin R, Nash K. 2004. Archaeological reconnaissance of the South Withlacoochee tract, St. Martins Marsh Aquatic Preserve/Crystal River State Buffer Preserve, Citrus county, Florida. Gulf Archaeology Research Institute, Crystal River, Florida.
5. Pluckhahn TJ, Thompson VD, Cherkinsky A. 2015 The temporality of shell-bearing landscapes at Crystal River, Florida. *J. Anthropol. Archaeol.* **37**,19–36. (doi:10.1016/j.jaa.2014.10.004)
6. Pluckhahn TJ, Thompson VD, Weisman BR. 2010. Toward a new view of history and process at Crystal River (8CI1). *Southeast. Archaeol*. **29**,164-181. (doi:10.1179/sea.2010.29.1.011)
7. Weisman BR. 1995. The Roberts Island Shell Mound Complex and its archaeological significance. Report 4365, Florida Division of Historical Resources, Tallahassee, Florida.
8. Kirby MX, Soniat TM, Spero HJ. 1998. Stable isotope sclerochronology of pleistocene and recent oyster shells (*Crassostrea virginica*). *Palaios* **13**,560-569. (doi:10.2307/3515347)
9. Andrus CFT, Crowe DE. 2000. Geochemical analysis of *Crassostrea virginica* as a method to determine season of capture *J. Archaeol. Sci.* **27**,33-42. (doi:10.1006/jasc.1999.0417)
10. Zimmt JB, Lockwood R, Andrus CFT, Herbert GS. 2019. Sclerochronological basis for growth band counting: A reliable technique for life-span determination of *Crassostrea virginica* from the mid-Atlantic United States. *Palaeogeogr. Palaeoclimatol. Palaeoecol.* **516**,54-63. (doi: 10.1016/j.palaeo.2018.11.029)
11. Surge D, Lohmann KC, Dettman DL. 2001 Controls on isotopic chemistry of the American oyster, *Crassostrea virginica*: Implications for growth patterns. *Palaeogeogr. Palaeoclimatol. Palaeoecol*. **172**,283-296. (doi:10.1016/S0031-0182(01)00303-0)

1. Corresponding author contact: shesterberg2013@gmail.com [↑](#footnote-ref-1)
